# Supplementary material
Source: publisher figshare collection journal article supplement (https://sage.figshare.com/ndownloader/files/14884106)
Supplement: Supplementary file 1 [file 14884106]

## Supplemental Material

**Supplemental Table S1. Characteristics of the included studies**

| Study                            | Sample size      | Demographic and clinical features of participants |                             |                                                                      |                    |                                 |      | Intervention                                                                                                                                                                                |                                |                                                                 |                                 |                                                             |
|----------------------------------|------------------|---------------------------------------------------|-----------------------------|----------------------------------------------------------------------|--------------------|---------------------------------|------|---------------------------------------------------------------------------------------------------------------------------------------------------------------------------------------------|--------------------------------|-----------------------------------------------------------------|---------------------------------|-------------------------------------------------------------|
|                                  |                  | Total<br>(EG/CG)                                  | Ages in years,<br>mean (SD) | Time since stroke<br>onset in days/<br>[weeks]/"months"<br>mean (SD) |                    | Paretic side<br>(n: right/left) |      | Experimental group                                                                                                                                                                          | Control group                  | Treatment<br>dosage                                             | Outcome<br>measures             | Video<br>types                                              |
|                                  |                  |                                                   |                             |                                                                      |                    |                                 |      |                                                                                                                                                                                             |                                |                                                                 |                                 |                                                             |
|                                  |                  |                                                   |                             |                                                                      |                    |                                 |      |                                                                                                                                                                                             |                                |                                                                 |                                 |                                                             |
|                                  |                  |                                                   |                             | EG                                                                   | CG                 | EG                              | CG   |                                                                                                                                                                                             |                                |                                                                 |                                 |                                                             |
| Bang DH<br>2013 <sup>19</sup>    | 30<br>(15/15)    | 64.1<br>(6.35)                                    | 58.9<br>(7.03)              | "14.1"<br>(3.78)                                                     | "12.6"<br>(3.86)   | 8/7                             | 6/9  | Action observation therapy<br>(watching videos for 9<br>minutes + Treadmill<br>training for 30 minutes)                                                                                     | Sham action<br>observation     | 40 min/day, 5<br>day/week, for<br>4 weeks                       | TUG;<br>10MWT;<br>6MWT;<br>KASW | Treadmill<br>training                                       |
| Cowles T<br>2013 <sup>5</sup>    | 22<br>(9/13)     | 78.8<br>(8.1)                                     | 75.6<br>(12.4)              | 19.5<br>(7.0)                                                        | 17.8<br>(5.1)      | 1/8                             | 6/7  | Conventional rehabilitation<br>+ action observation<br>therapy (watching the<br>therapist performing the<br>actions for 2 minutes and<br>then practicing the actions<br>for 4 to 6 minutes) | Conventional<br>rehabilitation | 30<br>min/session, 2<br>sessions/day,<br>for 15<br>working days | MI; ARAT                        | Functional<br>tasks (e.g.,<br>bring<br>telephone<br>to ear) |
| Dettmers C<br>2014 <sup>27</sup> | 56<br>(19/19/18) | 62.79<br>(N/A)                                    | 58.83<br>(11.25)            | "37.91"<br>(69.96)                                                   | "26.74"<br>(61.69) | 11/8                            | 12/6 | Conventional rehabilitation<br>+ action observation                                                                                                                                         | Conventional<br>rehabilitation | 1 hour/day,<br>for 6 weeks                                      | WMFT;<br>NHPT;                  | Functional<br>tasks (e.g.,                                  |

|                                  |               |                 |                  |                    |                  |       |       |                                                                                                                                                                   |                                                       |                                                         |                                        |                                                     |
|----------------------------------|---------------|-----------------|------------------|--------------------|------------------|-------|-------|-------------------------------------------------------------------------------------------------------------------------------------------------------------------|-------------------------------------------------------|---------------------------------------------------------|----------------------------------------|-----------------------------------------------------|
|                                  |               |                 |                  |                    |                  |       |       | therapy (watching each video clip for 5 minutes and then practice the same actions)                                                                               |                                                       |                                                         | MAL; SIS                               | grasping and lifting a glass)                       |
| Ertelt D 2007 <sup>2</sup>       | 16<br>(8/8)   | 57.16<br>(8.73) | 55.40<br>(10.77) | 1472.9<br>(1258.8) | 724.8<br>(360.9) | 2/6   | 2/6   | Action observation therapy (watching the videos for 6 minutes, and then performing the actions for 6 minutes; each action was presented twice)                    | Sham action observation                               | 90 min/day, for 18 working days                         | FAT; WMFT; SIS                         | Functional tasks (e.g., the use of a ball or a cup) |
| Franceschini M 2012 <sup>6</sup> | 90<br>(48/42) | 65.7<br>(11.9)  | 67.0<br>(12.4)   | 29.5<br>(4.2)      | 31.0<br>(4.6)    | 22/26 | 18/24 | Conventional rehabilitation + action observation therapy (watching the videos for 3 minutes and then performing the actions for 2 minutes, for 3 motor sequences) | Conventional rehabilitation + sham action observation | 15 min/session, 2 sessions/day, 5 day/week, for 4 weeks | BBT; FAT; FMA; MAS; FIM                | Functional tasks (e.g., drinking from a glass)      |
| Fu J 2017 <sup>7</sup>           | 53<br>(28/25) | 62.04<br>(9.93) | 59.76<br>(10.57) | 39.49<br>(18.45)   | 41.12<br>(18.79) | 12/16 | 13/12 | Conventional rehabilitation + action observation therapy (watching the videos for 10 minutes and then practicing the actions for 10 minutes)                      | Conventional rehabilitation + sham action observation | 20 min/day, 6 day/week, for 8 weeks                     | FMA; WMFT; MBI; Motor evoked potential | Upper-limb movements                                |

|                              |               |                 |                 |                    |                    |     |     |                                                                                                                                                         |                                                                              |                                                          |                                              |                                                           |
|------------------------------|---------------|-----------------|-----------------|--------------------|--------------------|-----|-----|---------------------------------------------------------------------------------------------------------------------------------------------------------|------------------------------------------------------------------------------|----------------------------------------------------------|----------------------------------------------|-----------------------------------------------------------|
| Kim CH<br>2016 <sup>20</sup> | 22<br>(11/11) | 60.77<br>(7.03) | 59.11<br>(7.05) | [12.89]<br>(2.93)  | [11.33]<br>(2.96)  | 5/6 | 5/6 | Conventional rehabilitation + action observation therapy (watching videos for 9 minutes, a break for 1 minute, and practicing the tasks for 30 minutes) | Conventional rehabilitation + task-oriented training                         | 40 min/day, 5 time/week, for 4 weeks                     | FMA;<br>BBT;<br>MBI;<br>MAS                  | Functional tasks (e.g., folding up a towel)               |
| Kim E<br>2015 <sup>8</sup>   | 12<br>(6/6)   | N/A             | N/A             | N/A                | N/A                | N/A | N/A | Conventional rehabilitation + action observation therapy (no report on detailed observation time)                                                       | Conventional rehabilitation + performing the actions without watching videos | 30 min/day, 5 day/week, for 6 weeks                      | WMFT                                         | Functional tasks (e.g., feeding)                          |
| Kim JC<br>2018 <sup>21</sup> | 21<br>(11/10) | 57.08<br>(7.29) | 52.92<br>(8.21) | “37.08”<br>(32.45) | “38.92”<br>(31.92) | 4/7 | 3/7 | Action observation therapy (watching videos for 2.5 minutes and practicing the action for 12.5 minutes)                                                 | Sham action observation                                                      | 15 min/session, 2 sessions/day, 3 time/week, for 6 weeks | WDI;<br>LOS;<br>TUG; DGI                     | Balance training, walking                                 |
| Kim JH<br>2013 <sup>22</sup> | 27<br>(9/9/9) | 55.3<br>(12.1)  | 59.8<br>(8.9)   | “8.3”<br>(3.3)     | “8.5”<br>(3.6)     | 6/3 | 3/6 | Neurodevelopmental therapy + action observation therapy (watching video for 20 minutes and practicing for 10 minutes)                                   | Neurodevelopmental therapy                                                   | 30 min/day, 5 time/week, for 4 weeks                     | TUG;<br>FRT;<br>WAQ;<br>FAC; gait parameters | Balance training, walking (e.g., stepping over obstacles) |

|                              |               |                 |                 |                  |                  |      |     |                                                                                                                                                                                |                                                                                                                                                                      |            |                             |                                                         |
|------------------------------|---------------|-----------------|-----------------|------------------|------------------|------|-----|--------------------------------------------------------------------------------------------------------------------------------------------------------------------------------|----------------------------------------------------------------------------------------------------------------------------------------------------------------------|------------|-----------------------------|---------------------------------------------------------|
| Kim JS<br>2012 <sup>23</sup> | 30<br>(15/15) | 64.1<br>(8.3)   | 65.5<br>(7.7)   | “4.6”<br>(1.3)   | “4.1”<br>(1.0)   | 8/7  | 8/7 | Conventional rehabilitation<br>+ action observation<br>therapy (watching 5<br>different kinds of video<br>clips in walking for 10<br>minutes and practicing for<br>10 minutes) | Conventional<br>rehabilitation +<br>watching a video in<br>which they were<br>taken through a<br>progressive<br>relaxation program                                   | 20 min/day | Gait<br>parameters          | Sit-to-<br>stand,<br>balance<br>training,<br>walking    |
| Oh SJ<br>2019 <sup>28</sup>  | 35<br>(17/18) | 58.85<br>(7.60) | 59.35<br>(9.39) | “5.81”<br>(0.87) | “5.66”<br>(0.94) | 12/5 | N/A | Functional action<br>observation therapy<br>(watching videos for 15<br>minutes and practicing for<br>15 minutes)                                                               | General action<br>observation therapy<br>(watching videos<br>for 15 minutes,<br>e.g., looking at the<br>front while<br>walking, and<br>practicing for 15<br>minutes) | 30 min/day | Gait<br>parameters<br>, FGA | Walking<br>(e.g.,<br>walking<br>around the<br>hospital) |

|                               |               |                  |                  |                    |                    |      |      |                                                                                                                                                                                                                                              |                                                        |                                     |                                        |                                                             |
|-------------------------------|---------------|------------------|------------------|--------------------|--------------------|------|------|----------------------------------------------------------------------------------------------------------------------------------------------------------------------------------------------------------------------------------------------|--------------------------------------------------------|-------------------------------------|----------------------------------------|-------------------------------------------------------------|
| Park EC<br>2015 <sup>24</sup> | 40<br>(20/20) | 51.15<br>(14.81) | 48.65<br>(12.81) | “14.91”<br>(6.1)   | “13.4”<br>(8.2)    | 11/9 | 9/11 | Conventional rehabilitation + action observation therapy (each training set including watching videos for 3 minutes, taking 1 minute break, and walking training for 5 minutes. The walking training took a total of 20 minutes per session) | Conventional rehabilitation + shame action observation | 30 min/day, 5 day/week, for 8 weeks | Static standing balance; TUG; 10MWT    | Walking (e.g., walking on a flat land)                      |
| Park HJ<br>2016 <sup>25</sup> | 25<br>(12/13) | 57.33<br>(6.89)  | 55.08<br>(8.12)  | “33.58”<br>(24.67) | “21.15”<br>(12.44) | 5/7  | 9/4  | Conventional rehabilitation + action observation therapy (no report on detailed observation time)                                                                                                                                            | Conventional rehabilitation + shame action observation | 30 min/day, 3 day/week, for 4 weeks | 10MWT; CWT; ABC; Gait parameters       | Community-based ambulation (e.g., walking in a parking lot) |
| Park HR<br>2014 <sup>26</sup> | 21<br>(11/10) | 55.91<br>(9.1)   | 54.80<br>(12.22) | “21.09”<br>(16.66) | “25.60”<br>(19.67) | 4/7  | 4/6  | Conventional rehabilitation + action observation therapy (watching video clips demonstrating 4 tasks for functional walking for 10 minutes)                                                                                                  | Conventional rehabilitation + shame action observation | 30 min/day, 3 day/week, for 4 weeks | 10MWT; F8WT; DGI; Gait symmetry scores | Weight shifting, walking (e.g., walking on straight paths)  |

|                           |               |               |               |               |               |             |                                                                                                                                                                   |                                                       |                                                         |              |                                                                       |
|---------------------------|---------------|---------------|---------------|---------------|---------------|-------------|-------------------------------------------------------------------------------------------------------------------------------------------------------------------|-------------------------------------------------------|---------------------------------------------------------|--------------|-----------------------------------------------------------------------|
| Sale P 2014 <sup>9</sup>  | 67<br>(33/34) | 66.5 (12.7)   |               | 29.6 (4.5)    |               | 30/37       | Conventional rehabilitation + action observation therapy (watching the videos for 3 minutes and then performing the actions for 2 minutes, for 3 motor sequences) | Conventional rehabilitation + sham action observation | 15 min/session, 2 sessions/day, 5 day/week, for 4 weeks | FMA; BBT     | Functional tasks (e.g., drinking a cup of coffee)                     |
| Zhu MH 2015 <sup>11</sup> | 61<br>(31/30) | 57.75 (15.57) | 56.89 (14.93) | 30.67 (17.85) | 31.54 (18.79) | 17/14 17/13 | Conventional rehabilitation + action observation therapy (watching each video for 50 seconds and then practicing the actions)                                     | Conventional rehabilitation                           | 30 min/day, 6 day/week, for 8 weeks                     | FMA; BI; MAS | Range of motion exercises, functional tasks (e.g., handling of a pen) |

Abbreviations: 6MWT, 6-Minute Walk Test; 10MWT, 10-Meter Walk Test; ABC, Activities-specific Balance Confidence scale; ARAT, Action Research Arm Test; BBT, Box and Block Test; BI, Barthel Index; CG, Control group; CWT, Community Walk Test; DGI, Dynamic Gait Index; EG, Experimental group; FAC, Functional Ambulation Category; FAT, Frenchay Arm Test; FGA, Functional Gait Assessment; FIM, Functional Independence Measure; FMA, Fugl-Meyer Assessment; FRT, Functional Reaching Test; KASW, knee angle in swing phase during walking; MAS, Modified Ashworth scale; MBI, modified Barthel Index; MI, Motricity Index; min, minutes; NHPT, Nine Hole Peg Test; SIS, Stroke Impact Scale; TUG, the Timed Up and Go test; WAQ, Walking Ability Questionnaire; WDI, Weight Distribution Index; WMFT, Wolf Motor Function Test.

Note. N/A indicates not available.

**Supplemental Table S2. Quality assessment of the included studies using the PEDro scale**

|                                  | Eligibility<br>criteria | Random<br>allocation | concealed<br>allocation | Baseline<br>comparability | Blind<br>subjects | Blind<br>therapists | Blind<br>assessors | Adequate<br>follow-up | Intention-to-<br>treat analysis | Between group<br>comparisons | Point estimates<br>and variability | Total<br>score |
|----------------------------------|-------------------------|----------------------|-------------------------|---------------------------|-------------------|---------------------|--------------------|-----------------------|---------------------------------|------------------------------|------------------------------------|----------------|
| Bang DH 2013 <sup>19</sup>       | Y                       | 1                    | 1                       | 1                         | 1                 | 0                   | 1                  | 1                     | 1                               | 1                            | 1                                  | 9              |
| Cowles T 2013 <sup>5</sup>       | Y                       | 1                    | 1                       | 0                         | 0                 | 0                   | 1                  | 0                     | 0                               | 1                            | 1                                  | 5              |
| Dettmers C 2014 <sup>27</sup>    | Y                       | 1                    | 0                       | 1                         | 0                 | 0                   | 1                  | 1                     | 0                               | 1                            | 0                                  | 5              |
| Ertelt D 2007 <sup>2</sup>       | Y                       | 1                    | 0                       | 1                         | 0                 | 0                   | 0                  | 1                     | 1                               | 1                            | 1                                  | 6              |
| Franceschini M 2012 <sup>6</sup> | Y                       | 1                    | 1                       | 1                         | 0                 | 0                   | 1                  | 1                     | 0                               | 1                            | 1                                  | 7              |
| Fu J 2017 <sup>7</sup>           | Y                       | 1                    | 0                       | 1                         | 0                 | 0                   | 0                  | 0                     | 0                               | 1                            | 1                                  | 4              |
| Kim CH 2016 <sup>20</sup>        | Y                       | 1                    | 1                       | 1                         | 0                 | 0                   | 1                  | 1                     | 1                               | 1                            | 1                                  | 8              |
| Kim E 2015 <sup>8</sup>          | N                       | 1                    | 0                       | 0                         | 0                 | 0                   | 0                  | 1                     | 1                               | 1                            | 1                                  | 5              |
| Kim JC 2018 <sup>21</sup>        | Y                       | 1                    | 0                       | 1                         | 0                 | 0                   | 0                  | 0                     | 0                               | 1                            | 1                                  | 4              |
| Kim JH 2013 <sup>22</sup>        | Y                       | 1                    | 1                       | 1                         | 0                 | 0                   | 0                  | 1                     | 0                               | 1                            | 1                                  | 6              |
| Kim JS 2012 <sup>23</sup>        | N                       | 1                    | 1                       | 1                         | 0                 | 0                   | 0                  | 1                     | 1                               | 1                            | 1                                  | 7              |
| Oh SJ 2019 <sup>28</sup>         | Y                       | 1                    | 0                       | 1                         | 0                 | 0                   | 0                  | 1                     | 0                               | 1                            | 1                                  | 5              |
| Park EC 2015 <sup>24</sup>       | Y                       | 1                    | 0                       | 0                         | 0                 | 0                   | 0                  | 1                     | 1                               | 1                            | 1                                  | 5              |
| Park HJ 2016 <sup>25</sup>       | Y                       | 1                    | 0                       | 1                         | 0                 | 0                   | 1                  | 1                     | 0                               | 1                            | 1                                  | 6              |
| Park HR 2014 <sup>26</sup>       | Y                       | 1                    | 1                       | 1                         | 0                 | 0                   | 1                  | 0                     | 0                               | 1                            | 1                                  | 6              |
| Sale P 2014 <sup>9</sup>         | Y                       | 1                    | 1                       | 1                         | 0                 | 0                   | 1                  | 1                     | 1                               | 1                            | 1                                  | 8              |
| Zhu MH 2015 <sup>11</sup>        | Y                       | 1                    | 0                       | 1                         | 0                 | 0                   | 1                  | 1                     | 1                               | 1                            | 1                                  | 7              |

**Supplemental Figure 1. Funnel plot for all included studies of meta-analyses**

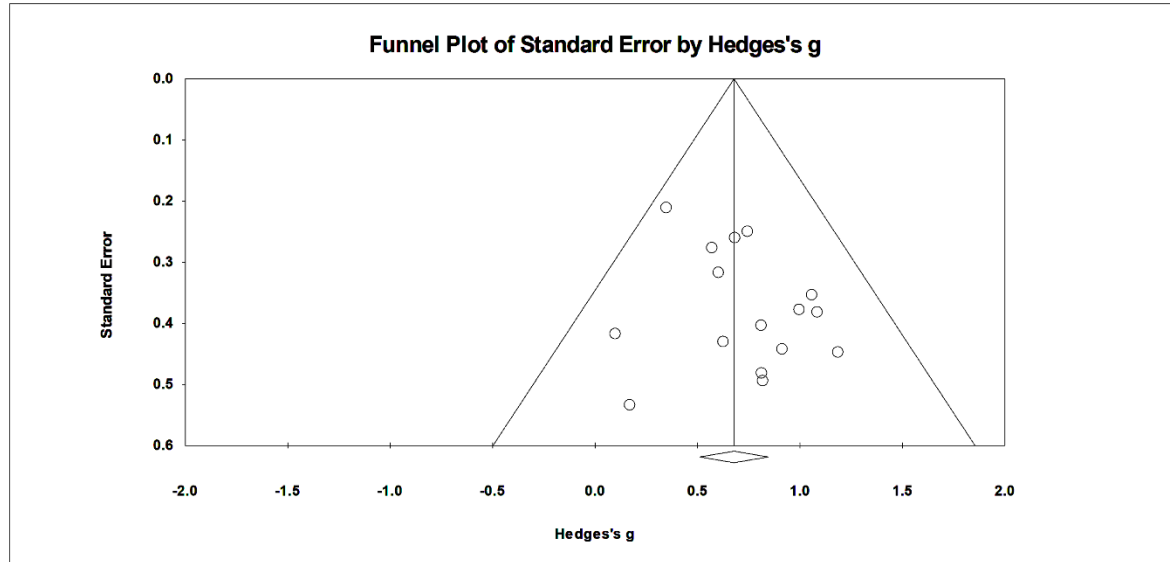



### Supplemental Appendix 1. Example of a searching strategy

| Recent queries in PubMed |                                                                                                                                                                        |             |
|--------------------------|------------------------------------------------------------------------------------------------------------------------------------------------------------------------|-------------|
| Search                   | Query                                                                                                                                                                  | Items found |
| #7                       | Search #5 AND #6                                                                                                                                                       | <b>601</b>  |
| #6                       | Search #3 AND #4                                                                                                                                                       | 11049       |
| #5                       | Search #1 OR #2                                                                                                                                                        | 448862      |
| #4                       | Search therapy OR treatment OR training OR physical training OR rehabilitation OR neurorehabilitation                                                                  | 11454061    |
| #3                       | Search action observation OR action observation-execution OR motor observation OR movement observation OR action imitation                                             | 24817       |
| #2                       | Search hemipleg* OR hemipar* OR paresis OR paretic                                                                                                                     | 42058       |
| #1                       | Search stroke OR poststroke OR cerebrovasc* OR cva* OR “cerebrovascular disease” OR “cerebrovascular accident” OR brain infarct* OR brain ischemi* OR brain hemorrhag* | 420135      |

**Supplemental Appendix 2. Excluded studies due to not written in English or Chinese.**

| Publication                                                                                                                                                                                                                                                                                                    | Language |
|----------------------------------------------------------------------------------------------------------------------------------------------------------------------------------------------------------------------------------------------------------------------------------------------------------------|----------|
| 1. Dettmers C, Braun N, Büsching I, Hassa T, Debener S, Liepert J. Neurofeedback-based motor imagery training for rehabilitation after stroke. <i>Nervenarzt</i> . 2016;87:1074-108.                                                                                                                           | German   |
| 2. Dettmers C, Nedelko V, Schoenfeld MA. New therapeutic approaches for stroke rehabilitation based on the concept of the mirror system. <i>Journal für Neurologie, Neurochirurgie und Psychiatrie</i> . 2012;13:5-10.                                                                                         | German   |
| 3. Ghanja A, Torkaman G, Ghabaee M, Ebrahimi E, Motaqhey M. Effect of action observation and imitation on improving the functional activities indices in hemiplegic patients based on mirror neurons theory. <i>Journal of Mazandaran University of Medical Sciences</i> . 2014;24:136-150.                    | Persian  |
| 4. Ghanjal A, Torkaman G, Ghabaee M, Ebrahimi E, Motaqhey M. The effect of action observation on weight distribution and dynamic balance index improvement in hemiparetic patients based on mirror neuron theory. <i>Journal of Zanjan University of Medical Sciences and Health Services</i> . 2015;23:77-88. | Persian  |
| 5. Kolářová B, Krobot A, Habermannová P, Kolář P, Bastlová P. Use of motion imagination and observation in cognitive and motion rehabilitation. <i>Rehabilitacia</i> . 2015;52:131-139.                                                                                                                        | Czech    |
